# Supplementary material for: Resolving Anatomical and Functional Structure in Human Brain Organization: Identifying Mesoscale Organization in Weighted Network Representations
Source: PubMed Central journal article supplement (PMC4183375; doi:10.1371/journal.pcbi.1003712), 2014-10-02

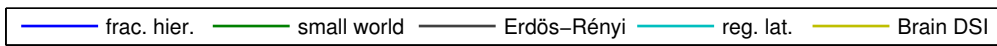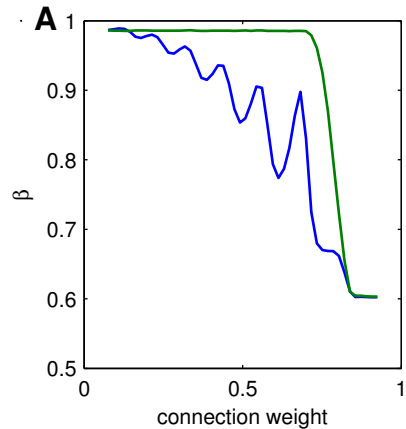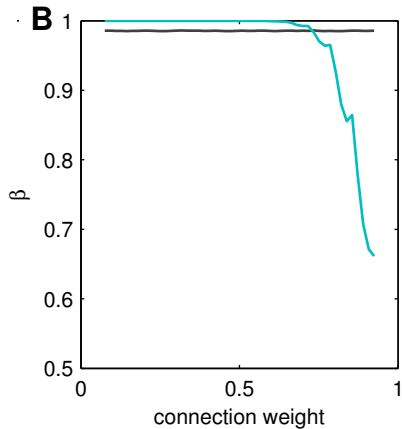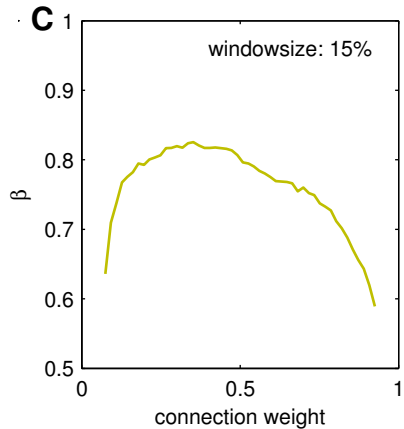

Supplement: pcbi.1003712.s003.pdf [file pcbi.1003712.s003.pdf]
