# Supplementary material for: Resolving Anatomical and Functional Structure in Human Brain Organization: Identifying Mesoscale Organization in Weighted Network Representations
Source: PubMed Central journal article supplement (PMC4183375; doi:10.1371/journal.pcbi.1003712), 2014-10-02
Supplement: pcbi.1003712.s005.pdf [file pcbi.1003712.s005.pdf]

frac. hier.

**A**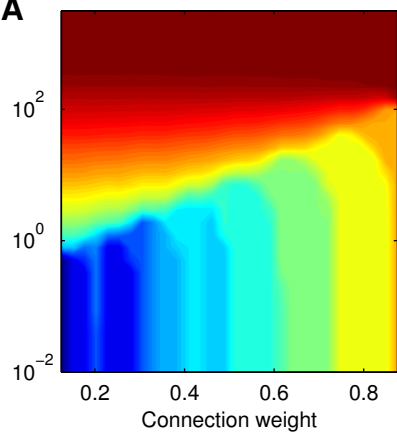

small world

**B**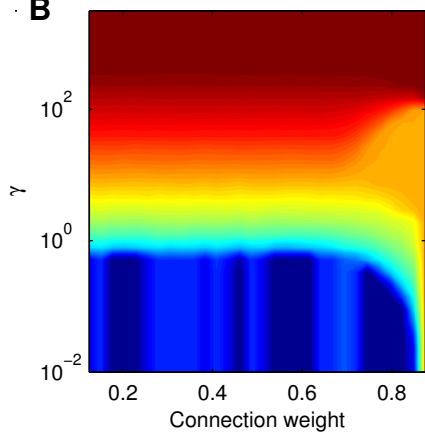

Erdős-Rényi

**C**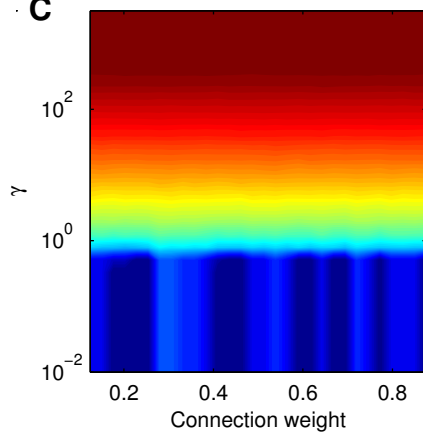

reg. lat.

**D**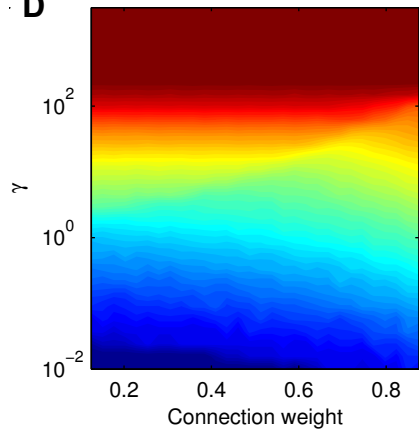

Brain DSI

**E**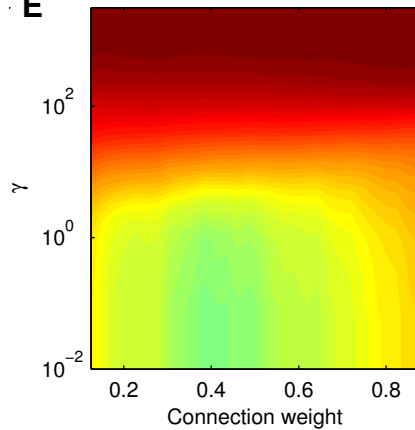 $\log_{10}(\text{no. of communities})$ 

3

2.5

2

1.5

1

0.5

0
