# Supplementary material for: Resolving Anatomical and Functional Structure in Human Brain Organization: Identifying Mesoscale Organization in Weighted Network Representations
Source: PubMed Central journal article supplement (PMC4183375; doi:10.1371/journal.pcbi.1003712), 2014-10-02
Supplement: pcbi.1003712.s006.pdf [file pcbi.1003712.s006.pdf]

| Network Type I       | Size of ensemble | Nodes | Edges K [ $10^3$ ] |       |       |
|----------------------|------------------|-------|--------------------|-------|-------|
| Brain DSI            | 6                | 1000  | 14.4               | $\pm$ | 0.5   |
| Erdős-Rényi          | 50               | 1000  | 14.4               | $\pm$ | 0.45  |
| Regular Lattice      | 50               | 1000  | 14.3               | $\pm$ | 0.6   |
| Fractal Hierarchical | 50               | 1000  | 14.4               | $\pm$ | 0.6   |
| Small World          | 50               | 1000  | 14.4               | $\pm$ | 0.46  |
| <hr/>                |                  |       |                    |       |       |
| Network Type II      |                  |       |                    |       |       |
| Brain fMRI           | 29               | 90    | 4.05               | $\pm$ | 0     |
| Erdős-Rényi          | 50               | 90    | 0.524              | $\pm$ | 0.025 |
| Regular Lattice      | 50               | 90    | 0.526              | $\pm$ | 0.026 |
| Fractal Hierarchical | 50               | 90    | 0.526              | $\pm$ | 0.030 |
| Small World          | 50               | 90    | 0.523              | $\pm$ | 0.032 |

**Table 1. Description of Network Ensembles.** The number of networks (size) in the ensemble, number of nodes, number of edges  $K$  given in units of [ $10^3$ ] edges for the two types of ensembles studied. Network Type I contains the brain DSI, Erdős-Rényi, Regular Lattice, Fractal Hierarchical, and Small World networks with  $N = 1000$  nodes. Network Type II contains the brain fMRI, Erdős-Rényi, Regular Lattice, Fractal Hierarchical, and Small World networks with  $N = 90$  nodes.
